# Supplementary material for: Methylglyoxal-Derived Nucleoside Adducts Drive Vascular Dysfunction in a RAGE-Dependent Manner
Source: MDPI journal article supplement (doi:10.3390/antiox13010085), 2024-01-10
Supplement: s1 [file s1]

## Supplemental Material

### **Methylglyoxal-derived nucleoside adducts drive vascular dysfunction in a RAGE-dependent manner**

Seigmund Wai Tsuen Lai<sup>1</sup>, Supriyo Bhattacharya<sup>2</sup>, Edwin De Jesus Lopez Gonzalez<sup>1</sup>, Sarah C. Shuck<sup>1\*</sup>

<sup>1</sup>Department of Diabetes and Cancer Metabolism, Arthur Riggs Diabetes and Metabolism Research Institute, City of Hope Comprehensive Cancer Center, Duarte, CA, United States

<sup>2</sup>Department of Computational and Quantitative Medicine, City of Hope National Medical Center, Duarte, CA, United States

\*Corresponding author: [sshuck@coh.org](mailto:sshuck@coh.org)

**Table S1. Human primer sequences used for quantitative PCR.**

| <b>Target</b> | <b>NCBI Gene Accession Number</b> | <b>Forward (5'→3')</b>   | <b>Reverse (5'→3')</b> |
|---------------|-----------------------------------|--------------------------|------------------------|
| ICAM1         | NC_000019.10                      | GTGTCCTGTATGGCCCCCGACT   | ACCTTGCGGGTGACCTCCCC   |
| VCAM1         | NC_000001.11                      | GTCAATGTTGCCCCCAGAGA     | TTTTCGGAGCAGGAAAGCCC   |
| ENOS          | NC_000007.14                      | TGATGGCGAAGCGAGTGAAG     | ACTCATCCATACACAGGACCC  |
| TSP1          | NC_000015.10                      | AGACTCCGCATCGCAAAGG      | TCACCACGTTGTTGTCAAGGG  |
| LINC00607     | NC_000002.12                      | ACCGGGCGTTGAGAATACAA     | ACACTTGGCGAAACTTCCCT   |
| TNFA          | NC_000006.12                      | ATGGAGACAGATGTGGGGTGT    | CTTCCAGGCATTCAACAGCTC  |
| IL1B          | NC_000002.12                      | ACTGGCGAGCTCAGGTACT      | CCATGCACTGGATGCTGAGAG  |
| IL6           | NC_000007.14                      | AGCAGGCACCCCAGTTAATC     | ATTTGTGGTTGGGTCAGGGG   |
| IFNG          | NC_000012.12                      | TGATTTCTTTTCAACTCTTCTGCT | TGGGACCTTTGGAGTATCAGC  |
| RAGE          | NC_000006.12                      | TCACCCTTCTCATTAGGCAC     | TACCATGGTGCTATCTCCCA   |
| GAPDH         | NC_000012.12                      | TTGGCTACAGCAACAGGGTG     | GGGGAGATTCAGTGTGGTGG   |

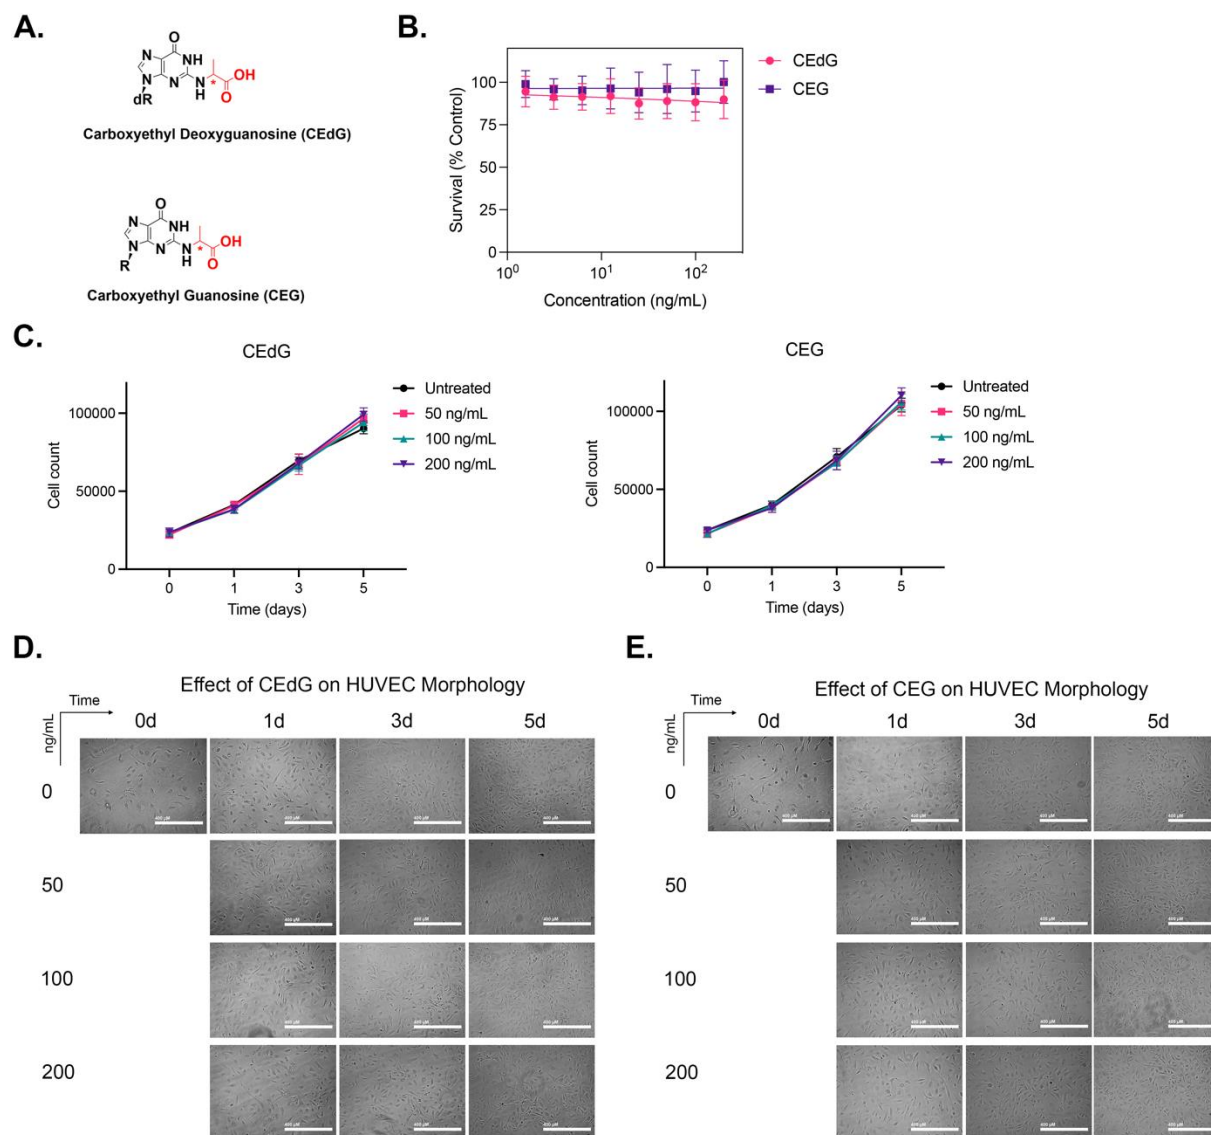

**Figure S1. MG-adducts do not impact HUVEC viability, proliferation, or morphology.** (A) Chemical structures of CEdG and CEG. (B) Impact of CEdG or CEG on viability in HUVECs treated for 24 hr at doses up to 200 ng/mL of CEdG or CEG. (C, D) Impact of CEdG or CEG up to 200 ng/mL on HUVEC proliferation. (E, F) Impact of CEdG or CEG up to 200 ng/mL on HUVEC morphology.

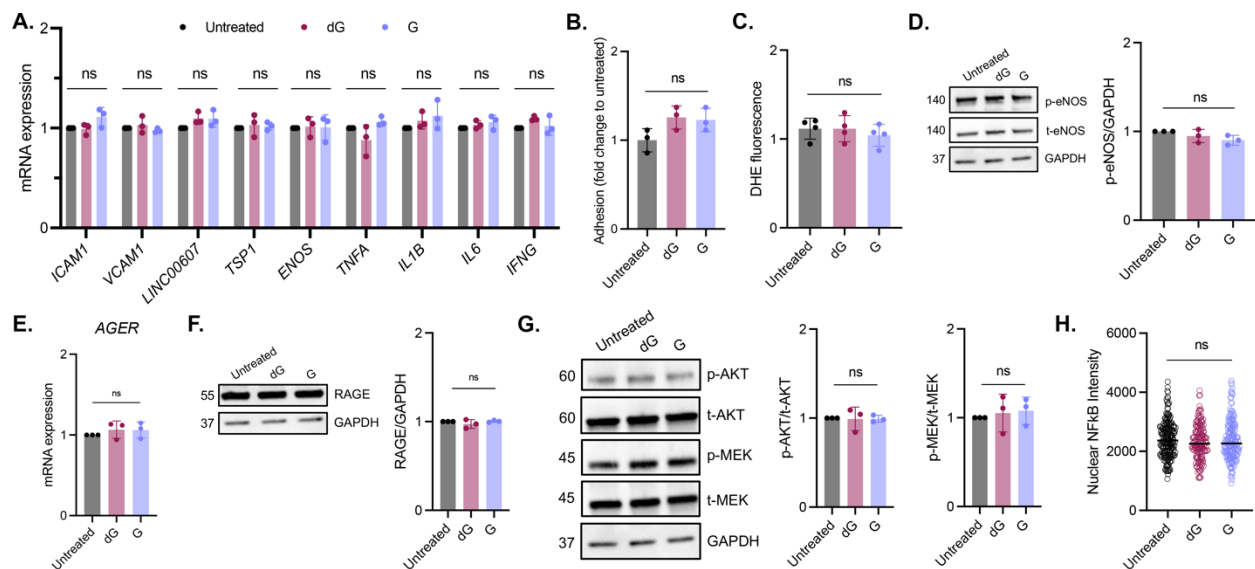

**Figure S2. Unmodified nucleosides do not induce endothelial dysfunction, activate RAGE, or promote NFκB nuclear translocation.** (A) qPCR analysis of *ICAM1*, *VCAM1*, *LINC00607*, *TSP1*, *ENOS*, *TNFA*, *IL1B*, *IL6*, and *IFNG* in HUVECs treated for 1 hour with 100 ng/mL of dG or G. (B) Functional effects on endothelial activation was assessed via monocyte adhesion assay. HUVECs were treated with 100 ng/mL of dG or G for 1 hr. (C) ROS were detected via dihydroxyethidium (DHE) probe in HUVECs treated with 100 ng/mL dG or G for 1 hr. (D) Western blot analysis for phosphorylated and total eNOS in HUVECs treated with 100 ng/mL of dG or G for 1 hr. (E) qPCR analysis of *AGER* expression in HUVECs treated with 100 ng/mL of dG or G for 1 hr. (F) Western blot analysis of RAGE expression in HUVECs treated with 100 ng/mL of dG or G for 1 hr. (G) Western blot analysis of RAGE activation in HUVECs treated with 100 ng/mL of dG or G for 1 hr. (H) NFκB nuclear translocation was measured via immunofluorescence and brightfield microscopy. HUVECs were treated with 100 ng/mL dG or G for 1 hr.

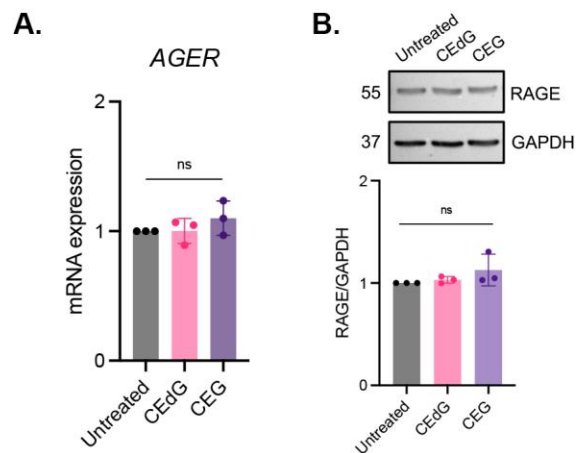

**Figure S3. MG-adducts do not impact RAGE gene and protein expression in HUVECs.** (A) qPCR analysis of *AGER* expression in HUVECs treated with 100 ng/mL of *R*, *S*-CEdG or CEG for 1 hr. (B) Western blot analysis of RAGE expression in HUVECs treated with 100 ng/mL of *R*, *S*-CEdG or CEG for 1 hr.

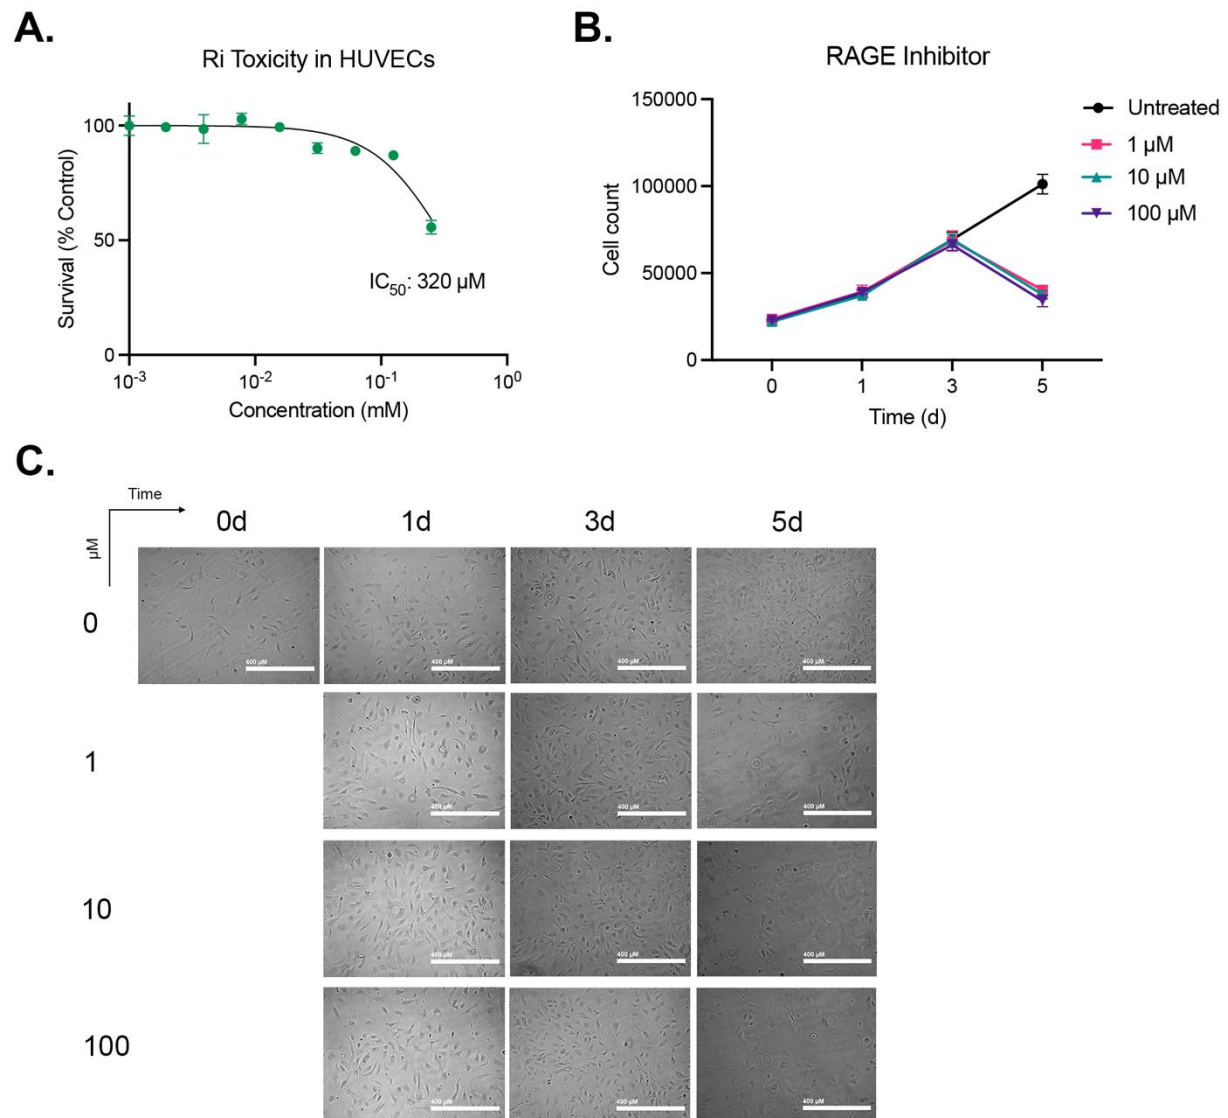

**Figure S4. Impact of Ri on HUVEC viability, proliferation, and morphology.** (A) HUVEC viability measured using crystal violet staining following treatment with Ri for 24 hr. (B) Impact of Ri on HUVEC proliferation. (C) Impact of Ri on HUVEC morphology.

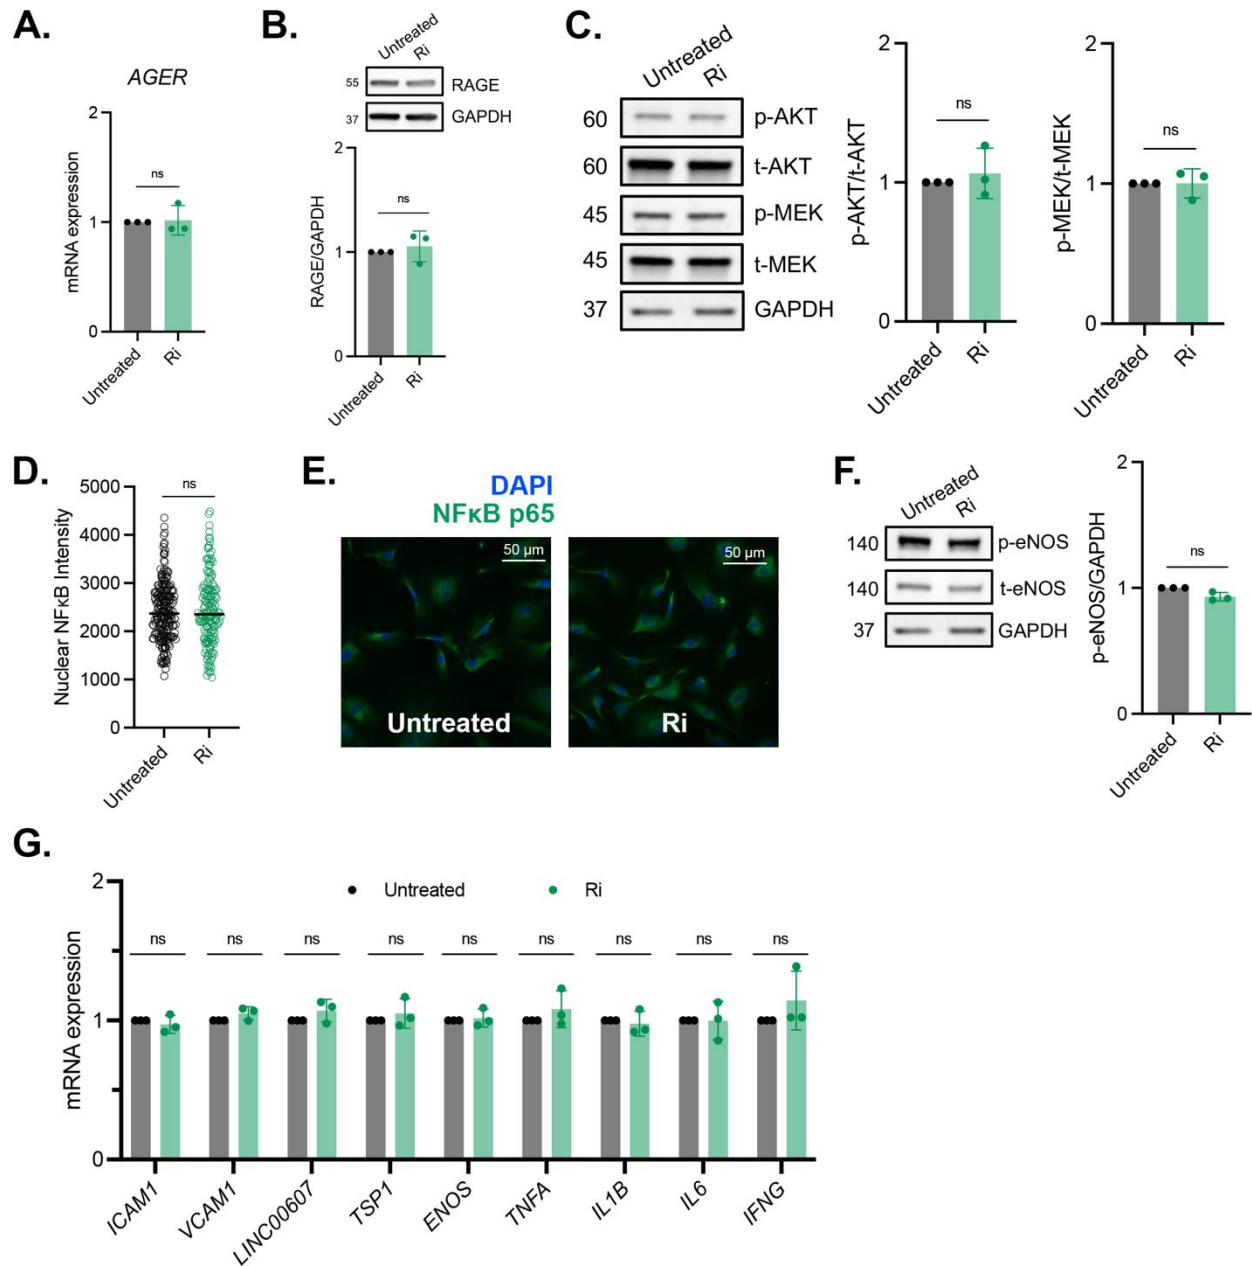

**Figure S5. Ri does not impact RAGE expression or activation, or induce endothelial dysfunction.** (A) qPCR analysis of *AGER* expression in HUVECs treated with Ri for 1 hr at 100 μM. (B) Western blot analysis of RAGE expression in HUVECs treated with Ri for 1 hr at 100 μM. (C) Western blot analysis of RAGE activation in HUVECs treated with Ri for 1 hr at 100 μM. (D) NFκB nuclear translocation was measured via immunofluorescence and brightfield microscopy. HUVECs were treated with 100 μM Ri for 1 hr. (E) Representative images of (D). (F) Western blot analysis of phosphorylated and total eNOS in HUVECs treated with Ri for 1 hr at 100 μM. (G) qPCR analysis of *ICAM1*, *VCAM2*, *LINC00607*, *TSP1*, *ENOS*, *TNFA*, *IL1B*, *IL6*, and *IFNG* expression in HUVECs treated with 100 μM Ri for 1 hr.

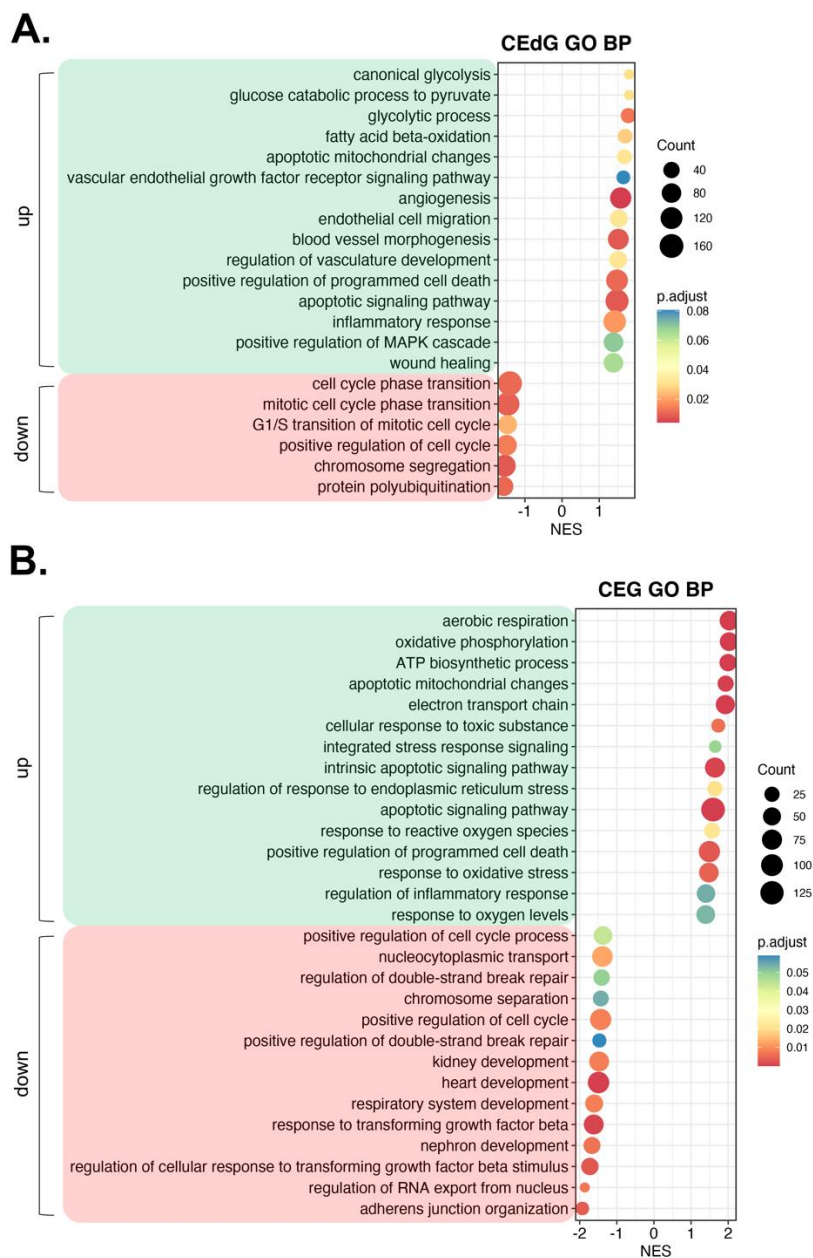

**Figure S6. GO-BP pathway analysis of MG-adduct treated HUVECs.** HUVECs were treated for 1 hr with 100 ng/mL (A) *R,S*-CEdG or (B) *R,S*-CEG for 1 hr and subjected to RNA sequencing.



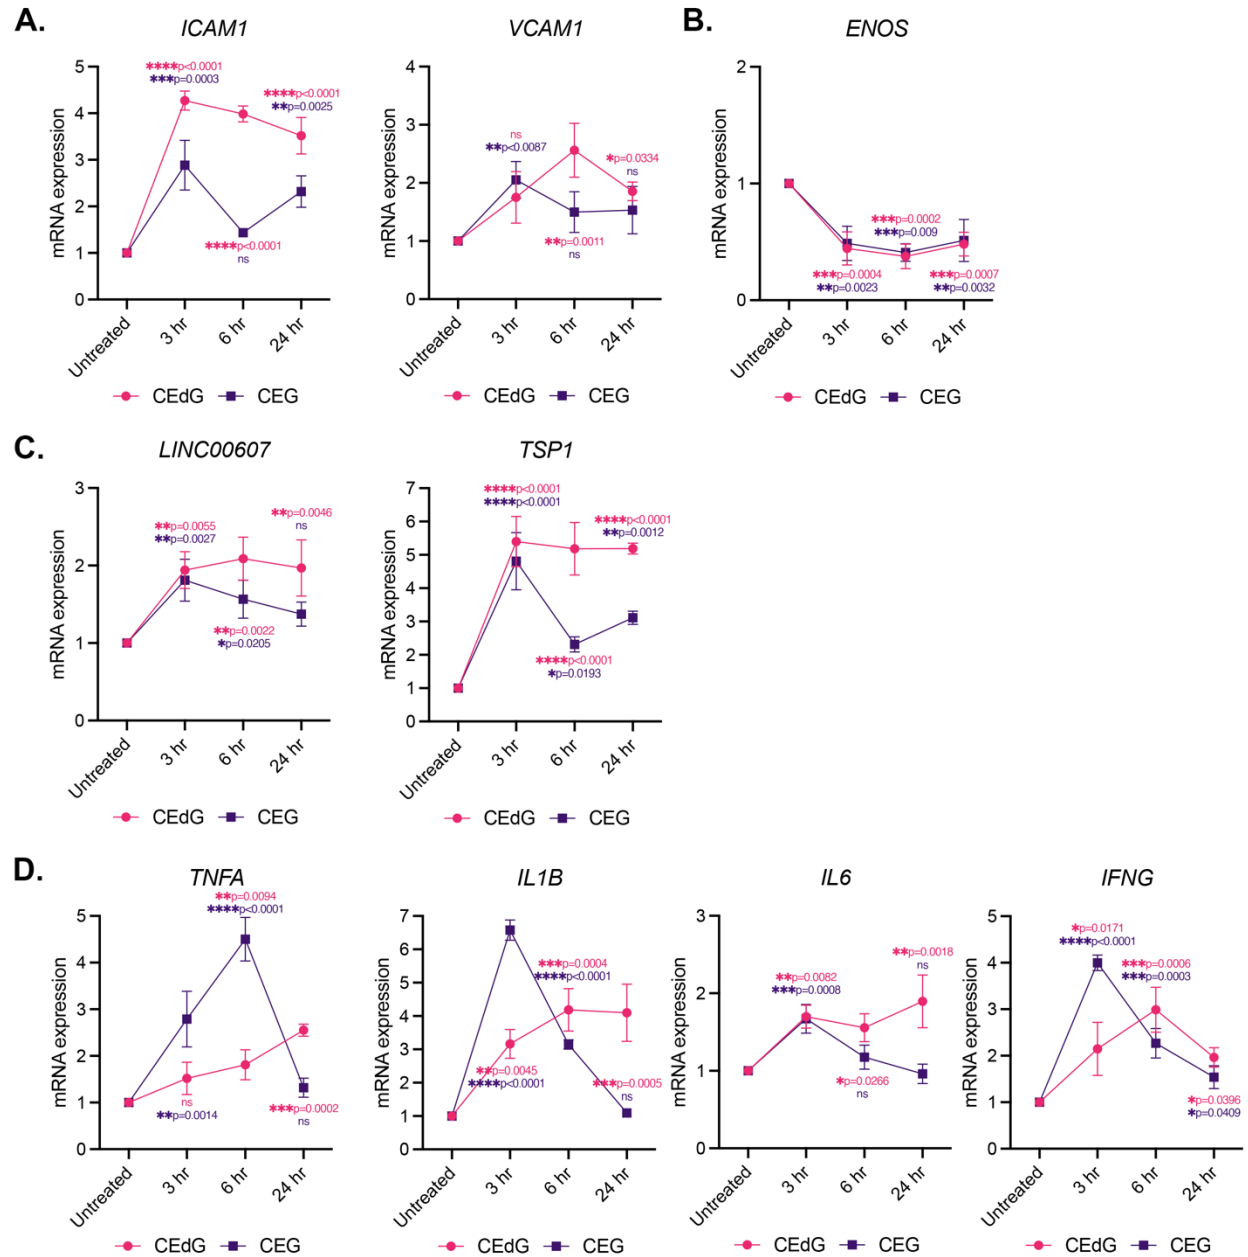

**Figure S7. Time dependent effects of MG-adducts on gene expression.** qPCR time course analysis of expression of (A) *ICAM1* and *VCAM1*, (B) *ENOS*, (C) *LINC00607*, *TSP1*, (D) and *TNFA*, *IL1B*, *IL6*, and *IFNG* in HUVECs treated with 100 ng/mL *R,S*-CEdG or CEG for the indicated timepoints.

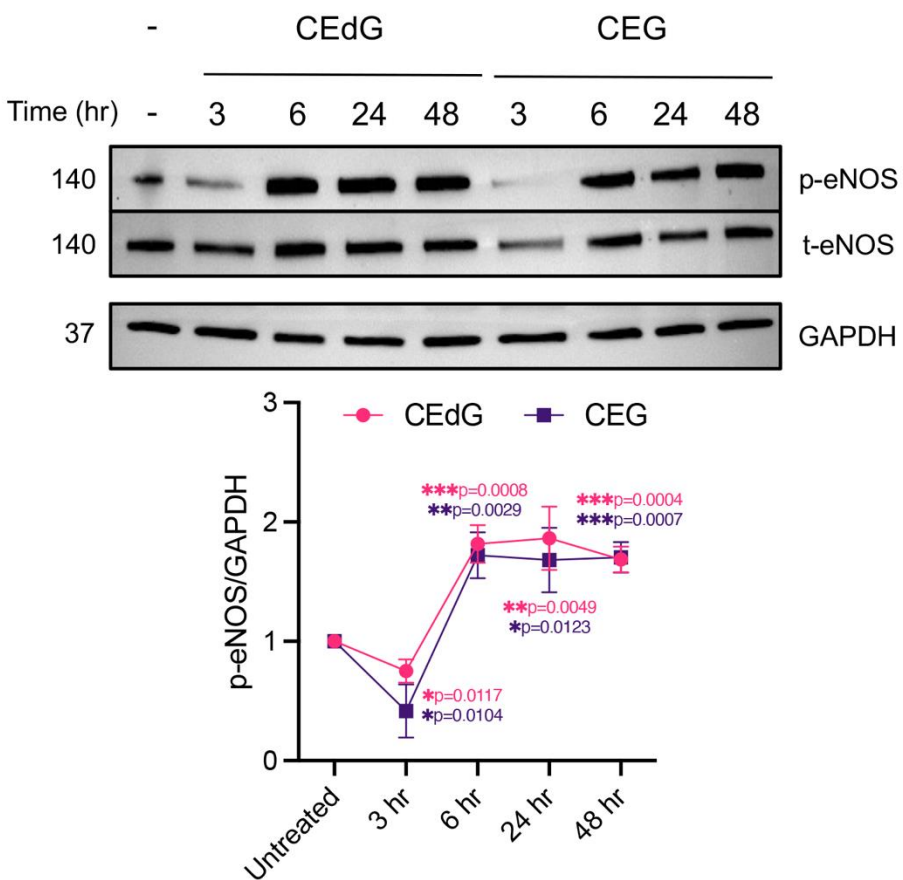

**Figure S8. Time dependent effects of MG-adducts on endothelial dysfunction.** Western blot time course analysis of expression of total and phosphorylated eNOS in HUVECs treated with 100 ng/mL of *R,S*-CEdG or CEG for the indicated timepoints.

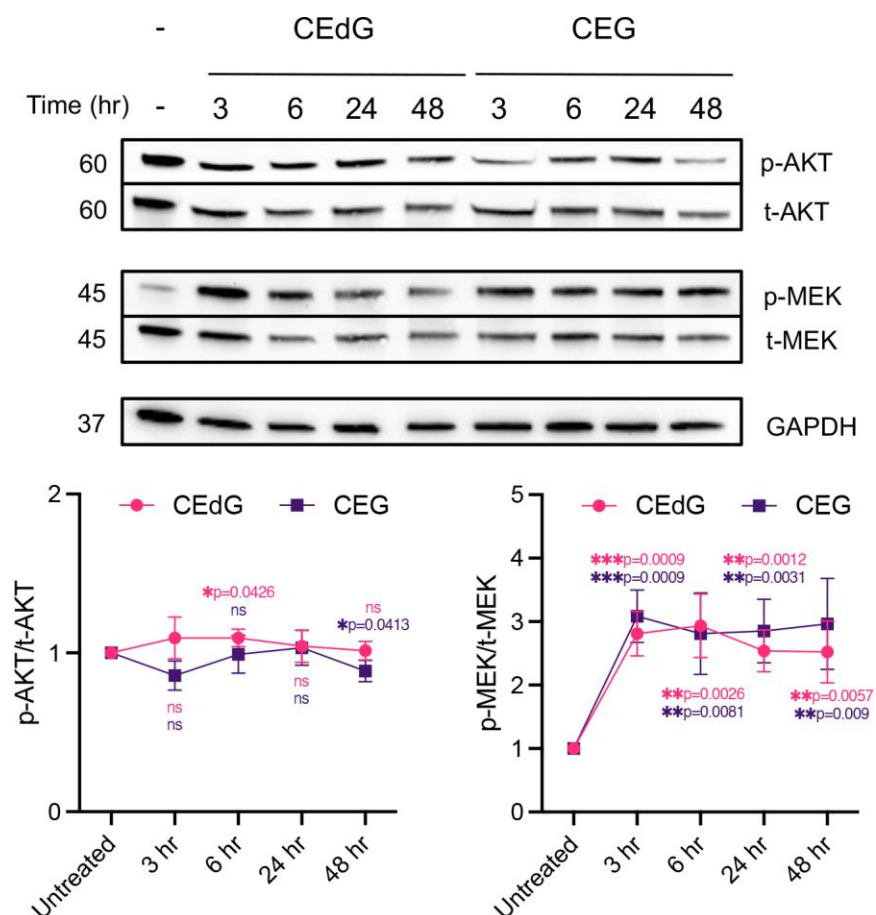

**Figure S9. Time dependent effects of MG-adducts on RAGE activation.** Western blot time course analysis of expression of total and phosphorylated AKT and MEK in HUVECs treated with 100 ng/mL of *R,S*-CEdG or CEG for the indicated timepoints.
